# Supplementary material for: Variations in the poly-histidine repeat motif of HOXA1 predispose individuals to bicuspid aortic valve
Source: Research Square preprint supplement (doi:10.21203/rs.3.rs-1415862/v1), 2022-03-10
Supplement: Supplementary file 1 [file 6917d353b43c4e77692d7939.pdf]

|          |              |                                                                |     |
|----------|--------------|----------------------------------------------------------------|-----|
| <b>a</b> | hoxa1a zebra | -----MSTFLDFSSIISGGDGGSGGSCSVRAFHGDHGLSTFQSSCAVRLNSCSGDERFMS   | 55  |
|          | HOXA1 Human  | MDNARMNSFLEYPIILSS-----GDSGTCSARAYPSDHRITTFQ-SCAVSANS CGGDRFLV | 55  |
|          | Hoxa1 Mouse  | -----MNSFLEYPIILGS-----GDSGTCSARAYPSDHGITTFQ-SCAVSANS CGGDRFLV | 50  |
|          | hoxa1a zebra | NISSQDV-----INSQPQAGSYQSPGTLSTITYS---AHPSYGTQSFCTGYNHIALN      | 104 |
|          | HOXA1 Human  | GRGVQIGSP-HHHHHHHHPQATYQTSGLGVSYSHSSCGPSYGSQNFSAPIYSPYALN      | 114 |
|          | Hoxa1 Mouse  | GRGVQISSPHHHHHHHHPQTATYQTSGLGISYSHSSCGPSYGAQNFSAPIYGPYGLN      | 110 |
|          | hoxa1a zebra | QDVESVSVPQCGPLVYSGNISSTVQHRHRHRYSSGNVHLHGQFQYGSATYGNSSDQA      | 164 |
|          | HOXA1 Human  | QEADVSGGYPCAPAVYSGNLSPPMVQHHRHRYAGGAVGS---PQYIHHSYGQEHQS-      | 170 |
|          | Hoxa1 Mouse  | QEADVSGGYPCAPAVYSGNLSPPMVQHHRHRYAGGTVGS---PQYIHHSYGQEQQT-      | 166 |
|          | hoxa1a zebra | NLTFVAGCSNPLSPLHVPHDACCSPISDGVPTGQTFDWMKVKNPPKTKGAGEYGFGGQ     | 224 |
|          | HOXA1 Human  | --LALATYNNLSLPLHASHQEACRSPASETSSPAQTFDWMKVKNPPKTKGVGEYGLGQ     | 228 |
|          | Hoxa1 Mouse  | --LALATYNNLSLPLHASHQEACRSPASETSSPAQTFDWMKVKNPPKTKGVGEYGVVGQ    | 224 |
|          | hoxa1a zebra | PNTVTRTNFSTKQLTELEKEFHFNKYLTRARRVEIAASLQLNETQVKIWFQNRMRMKQKKRE | 284 |
|          | HOXA1 Human  | PNAVRTNFTTKQLTELEKEFHFNKYLTRARRVEIAASLQLNETQVKIWFQNRMRMKQKKRE  | 288 |
|          | Hoxa1 Mouse  | PNAVRTNFTTKQLTELEKEFHFNKYLTRARRVEIAASLQLNETQVKIWFQNRMRMKQKKRE  | 284 |
|          | hoxa1a zebra | KEGLLPKSLSEQKDGLEKTEDASEKSPSAPSTPSPSPIVEAYSNN--                | 329 |
|          | HOXA1 Human  | KEGLLPISPAATPPGNDEKAESEKSSSSPVPSPGSSSDTLTTSH                   | 335 |
|          | Hoxa1 Mouse  | KEGLLPISPAATPPGSDEKTESEKSSSPSPSAPSPASSSDTLTTSH                 | 331 |

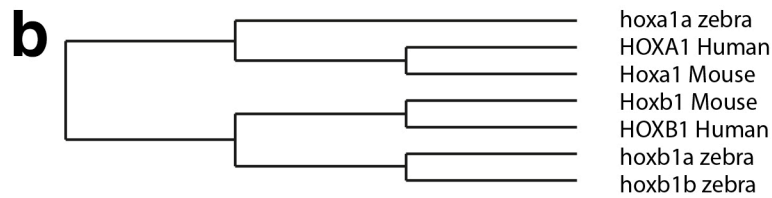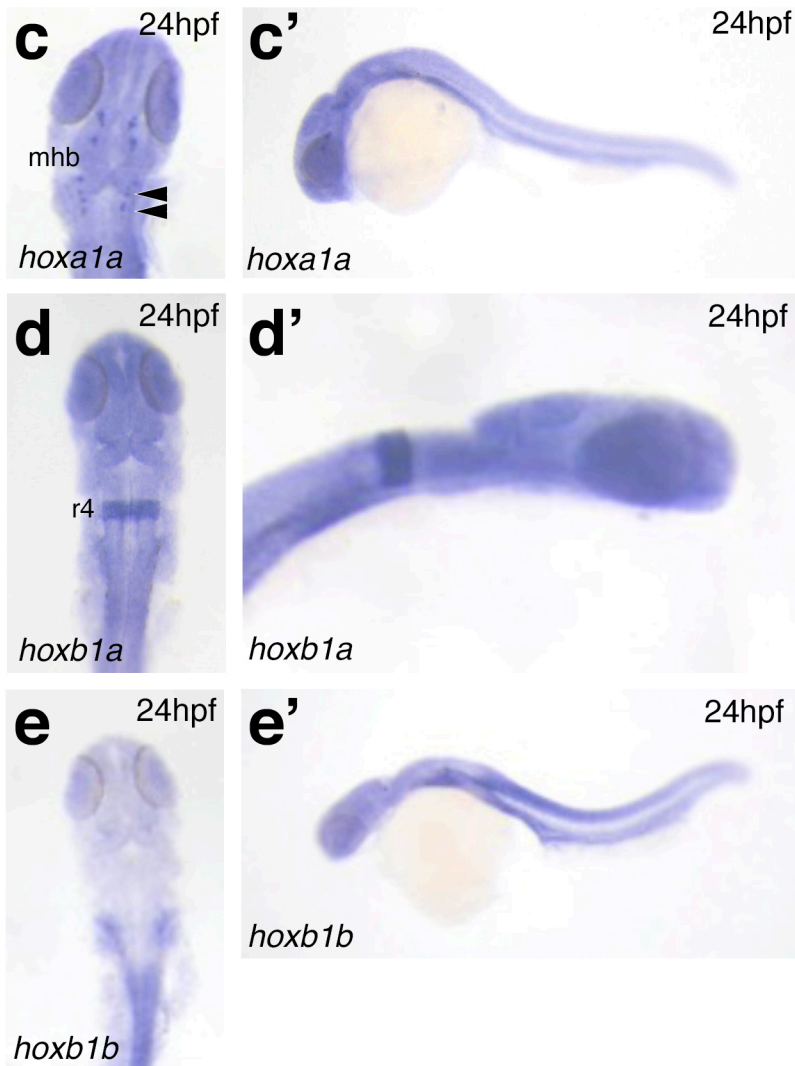

Extended data Figure 1

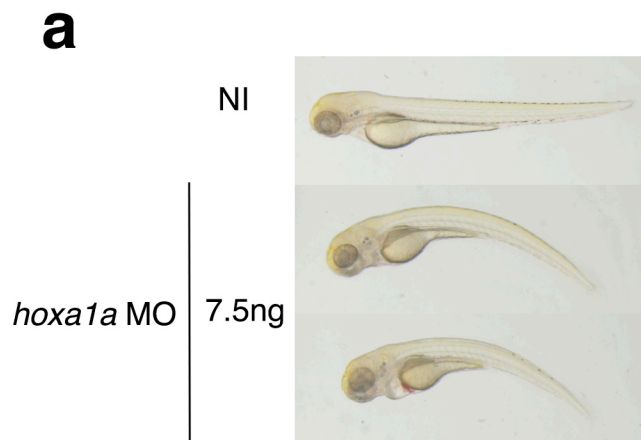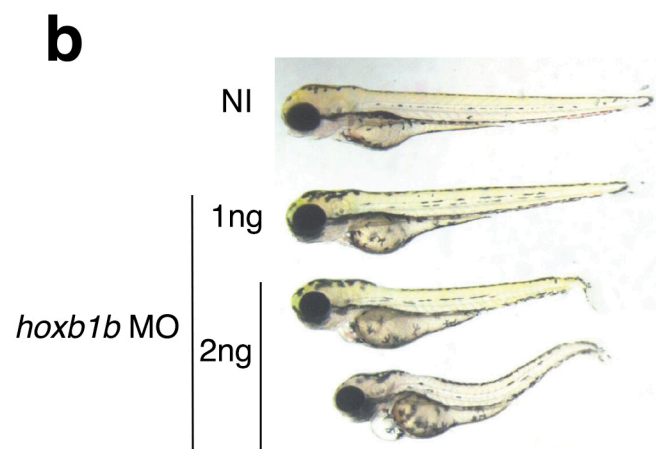

Extended data Figure 2

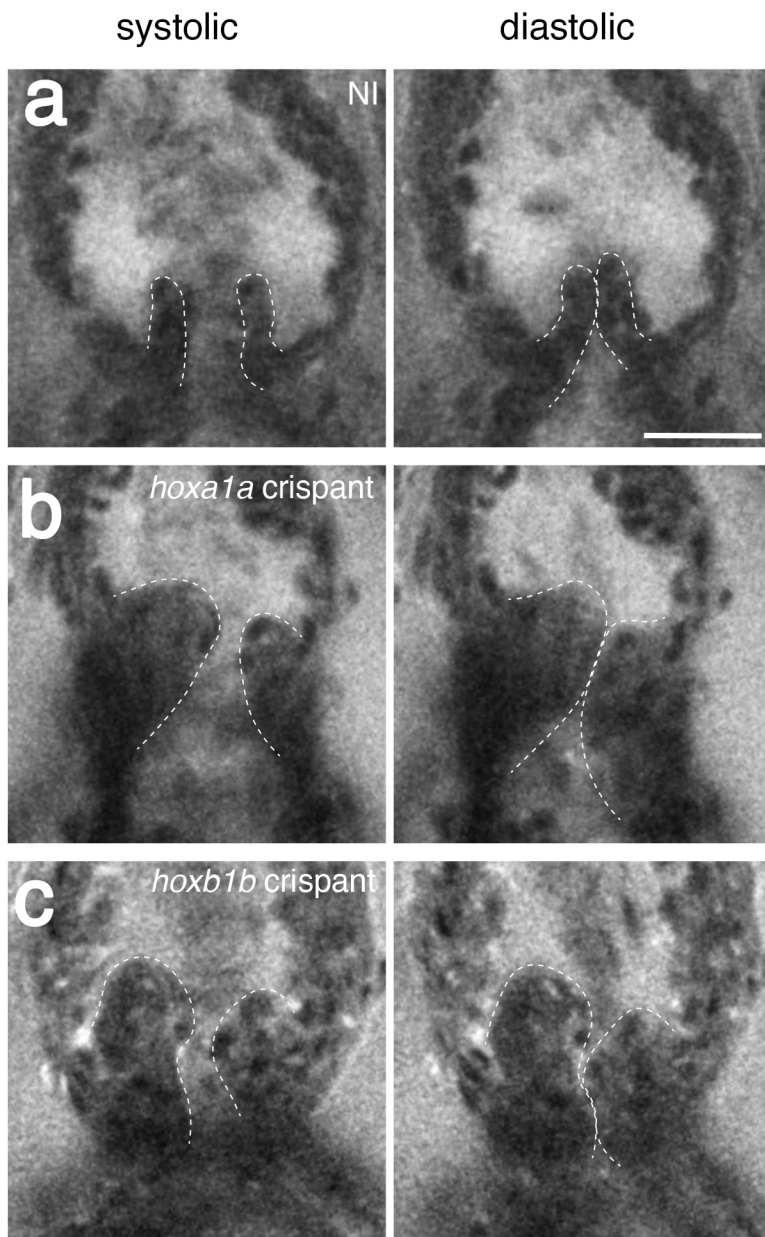

**d**

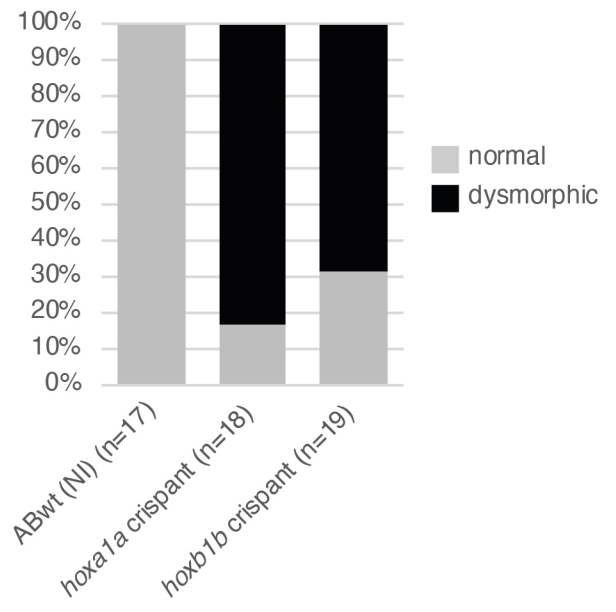

Extended data Figure 3

**a**

NI

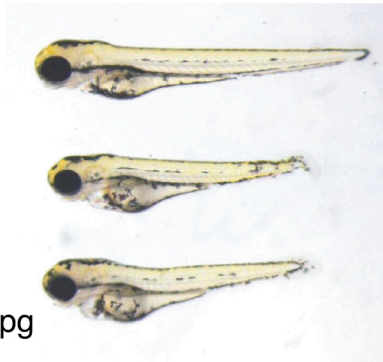

*hoxb1b* MO 1.5 ng

*hoxb1b* MO 1.5 ng  
+*hHOXA1* mRNA 25 pg

**b**

NI

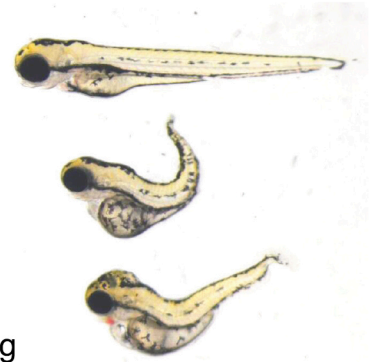

*hoxb1b* MO 2 ng

*hoxb1b* MO 2 ng  
+*hHOXA1* mRNA 25 pg

Extended data Figure 4



**a**

NI

WT<sup>A</sup> 25 pg

+1His 25 pg

-3His<sup>Arg</sup> 25 pg

-1His<sup>Arg</sup> 25 pg

-1His 25pg

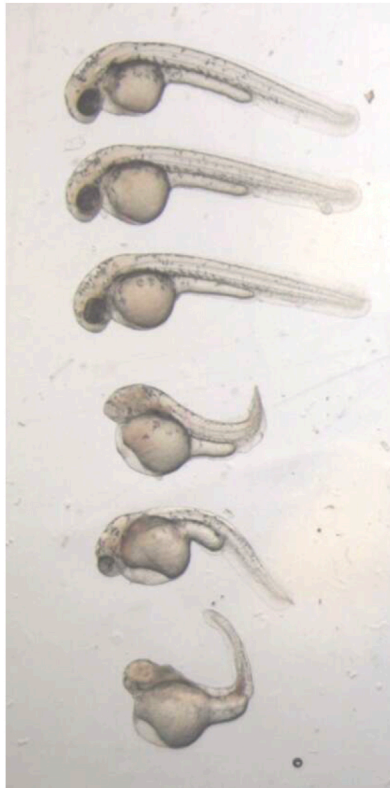

**b**

NI

-3His<sup>Arg</sup> 1 pg

-3His<sup>Arg</sup> 5 pg

-3His<sup>Arg</sup> 10 pg

-3His<sup>Arg</sup> 25 pg

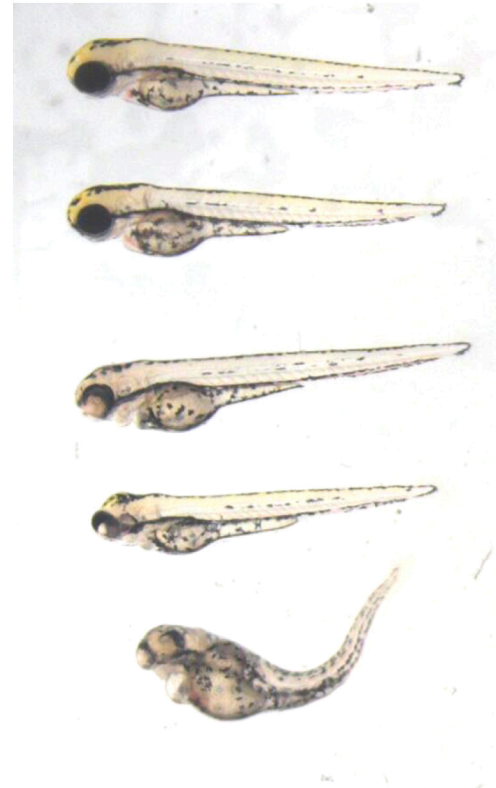

Extended data Figure 5

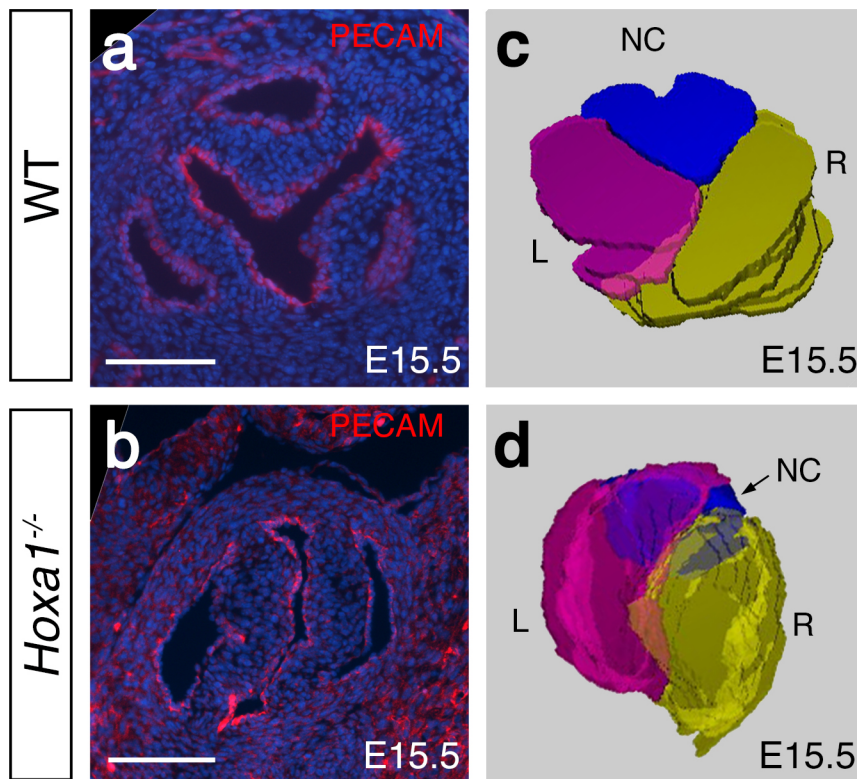

Extended data Figure 6

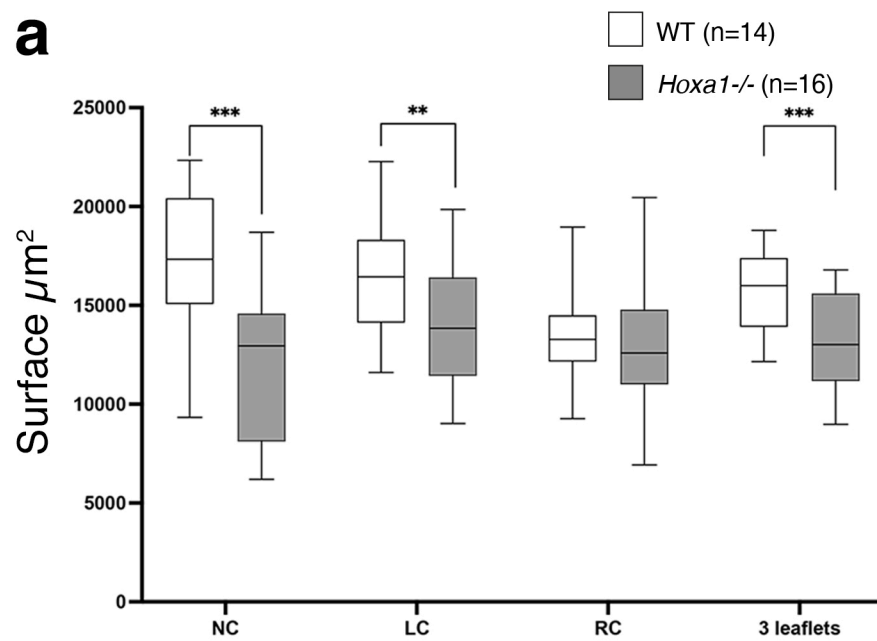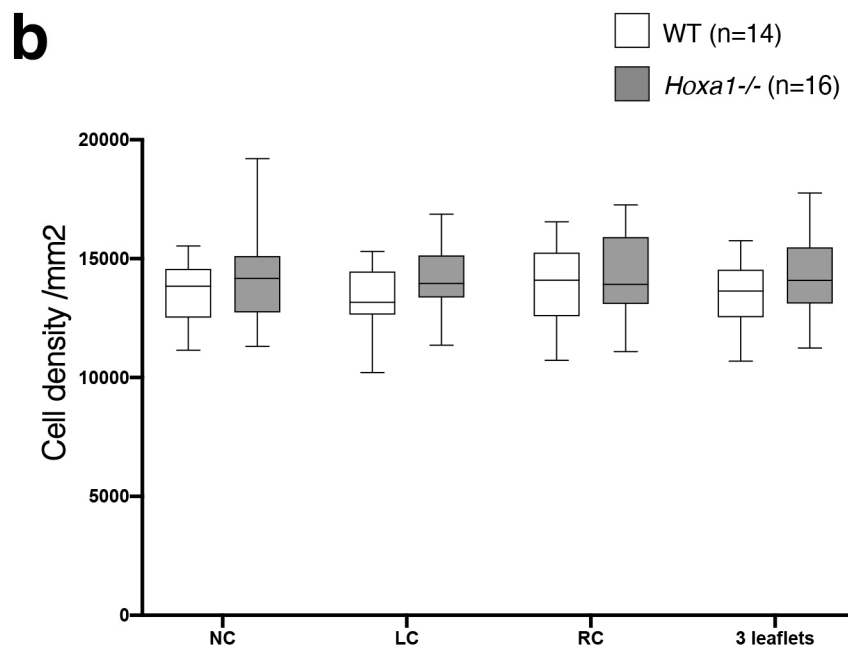

Extended data Figure 7

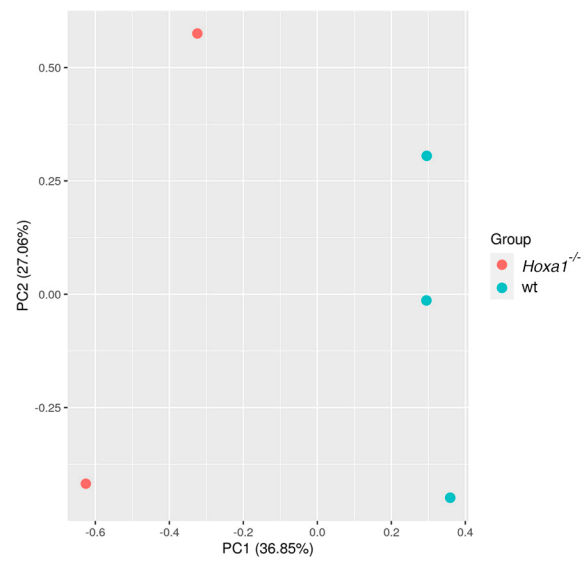

Extended data Figure 8

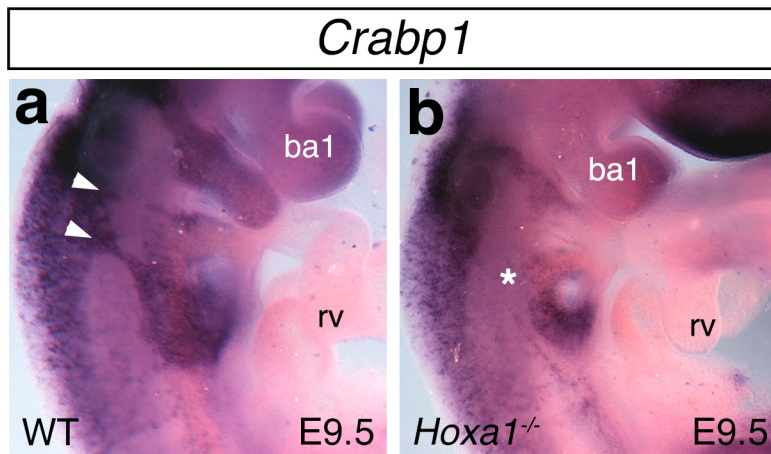



*Hoxa1-enhIII-cre;R26R*

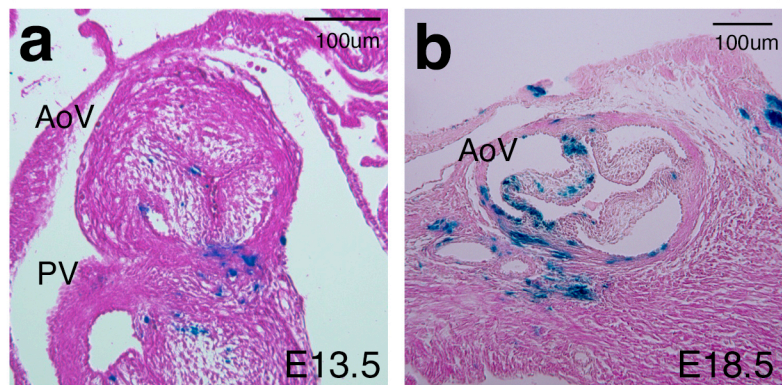

Extended data Figure 10
