# Supplementary material for: Variations in the poly-histidine repeat motif of HOXA1 predispose individuals to bicuspid aortic valve
Source: Research Square preprint supplement (doi:10.21203/rs.3.rs-1415862/v1), 2022-03-10
Supplement: Supplementary file 2 [file 9567e134400c8d40c9b6bf21.xlsx]

## Sheet: Up
padj	geneName	HGNC	log2FoldChange
6.1073534806705e-08	ENSMUSG00000089739.2	Gm20431	27.3066441325112
9.27216281235096e-07	ENSMUSG00000097346.1	Rps18-ps4	25.2763807728503
8.26448848450094e-18	ENSMUSG00000028356.4	Ambp	11.254755319812
1.08490718857101e-15	ENSMUSG00000029368.10	Alb	10.6955877296291
8.21595814641184e-15	ENSMUSG00000017950.16	Hnf4a	10.4058909300263
3.4001615958335e-14	ENSMUSG00000071178.11	Serpina1b	10.2460214385679
1.8094631908941e-13	ENSMUSG00000033860.13	Fgg	9.9778039123627
1.3702895122587e-12	ENSMUSG00000025075.14	Habp2	9.73773758428335
0.0468793556626832	ENSMUSG00000054932.6	Afp	9.42368564891453
2.85241744747053e-08	ENSMUSG00000052371.5	Hoxd3os1	9.04907559784993
4.45590538730583e-10	ENSMUSG00000072849.10	Serpina1e	8.99523390207509
0.00278320223168329	ENSMUSG00000020875.9	Hoxb9	8.94770713738217
2.27793322588378e-62	ENSMUSG00000037254.18	Itih2	8.87485379930391
2.67246396468617e-09	ENSMUSG00000079015.2	Serpina1c	8.8415633576558
5.18905700099945e-06	ENSMUSG00000033831.5	Fgb	8.69092694884397
1.21901418960279e-07	ENSMUSG00000085645.1	Hoxb5os	8.57050725570102
9.63904082209109e-08	ENSMUSG00000029369.17	Afm	8.52327686677562
3.88290255547423e-08	ENSMUSG00000059481.4	Plg	8.35021332729644
2.08663439288353e-29	ENSMUSG00000038224.12	Serpinf2	8.2909441203915
2.69257751067458e-07	ENSMUSG00000071177.4	Serpina1d	8.11497321595641
3.36368443263123e-07	ENSMUSG00000052595.7	A1cf	8.04987804449401
1.27683464203716e-06	ENSMUSG00000028357.13	Kif12	7.86480338118123
1.06041369850117e-05	ENSMUSG00000071613.11	Gm10340	7.63508574426551
9.06553972506393e-06	ENSMUSG00000093938.2	Evi2b	7.61670643670585
1.96089293245094e-05	ENSMUSG00000090555.1	Gm8893	7.54261688712666
0.000206031428900017	ENSMUSG00000029644.7	Pdx1	7.40284867720717
3.64936029240898e-05	ENSMUSG00000061947.10	Serpina10	7.3823816862119
0.000903367333645804	ENSMUSG00000027690.13	Slc2a2	7.27143984030317
0.0127895518779919	ENSMUSG00000043342.9	Hoxd9	7.24784045605138
0.000153866844170779	ENSMUSG00000027249.15	F2	7.20209767892488
0.000153866844170779	ENSMUSG00000028001.16	Fga	7.17777895183184
1.05773461282681e-11	ENSMUSG00000066366.14	Serpina1a	7.07042730348353
0.00533620863169789	ENSMUSG00000083623.1	Gm7224	6.61733223023299
3.22049443612791e-06	ENSMUSG00000060807.7	Serpina6	6.52960731457545
0.0366611612957693	ENSMUSG00000038624.13	Nepn	6.15103868547683
8.1589209369545e-07	ENSMUSG00000074768.6	Bhmt	6.10898109718945
1.80441178835586e-07	ENSMUSG00000022766.12	Serpind1	5.81383251967663
0.00501580712684043	ENSMUSG00000099519.1	Gm29253	5.55980440217215
0.0112346649465163	ENSMUSG00000104953.1	Gm47308	5.52892102174778
9.72345444179079e-05	ENSMUSG00000097285.1	NA	5.48289937406315
1.36205199956155e-05	ENSMUSG00000088929.1	Gm24299	5.40944523698861
3.43924884679131e-33	ENSMUSG00000061808.3	Ttr	5.35888477588319
8.72242658086117e-21	ENSMUSG00000038591.3	Colec10	5.1519285837551
3.21840704461212e-16	ENSMUSG00000048938.12	Nr1h5	5.04054501498953
1.50823869703822e-09	ENSMUSG00000038721.8	Hoxb7	4.94046099301224
1.53909069965452e-09	ENSMUSG00000071551.13	Akr1c19	4.88576792404152
1.94064701993608e-06	ENSMUSG00000001661.5	Hoxc6	4.80487309875354
1.09097927604349e-17	ENSMUSG00000056648.5	Hoxb8	4.7887841669183
1.46567952033071e-24	ENSMUSG00000000690.5	Hoxb6	4.61146007635047
0.0443370780733538	ENSMUSG00000069324.5	Gm5096	4.49765039630616
0.000912423631563426	ENSMUSG00000027102.4	Hoxd8	4.27857351188593
0.00016403111813388	ENSMUSG00000029260.15	Ugt2b34	4.2205822651562
0.0171389402377612	ENSMUSG00000029556.12	Hnf1a	3.74926127781904
0.0362170419511861	ENSMUSG00000032083.8	Apoa1	3.73732904477396
0.00249110313286668	ENSMUSG00000072625.1	Gdf2	3.71518261952265
0.0253372575147022	ENSMUSG00000021999.8	Cpb2	3.24567760332364
6.97812814931425e-14	ENSMUSG00000024990.12	Rbp4	3.18935362710819
7.89513746745905e-05	ENSMUSG00000027750.16	Postn	3.06869455348269
0.0221196545892551	ENSMUSG00000068284.14	Usf3	3.05295051142686
0.000172975254307786	ENSMUSG00000029370.10	Rassf6	2.95502007895048
4.71948294229899e-12	ENSMUSG00000005681.12	Apoa2	2.81499618215538
0.0199476224910753	ENSMUSG00000032852.3	Rspo4	2.73950166175639
5.31952786819707e-15	ENSMUSG00000020609.14	Apob	2.73156776207713
0.003439921903207	ENSMUSG00000040035.14	Disp2	2.61033888441163
2.20229848606462e-27	ENSMUSG00000050010.8	Shisa3	2.59246418406119
0.000170736673038032	ENSMUSG00000024164.15	C3	2.58439381004025
2.10280563664177e-08	ENSMUSG00000034450.8	Gulo	2.55749671385113
0.0254033495214983	ENSMUSG00000032502.8	Stac	2.52364357231227
1.30440547967091e-31	ENSMUSG00000033066.15	Gas7	2.51358570457195
0.0103171288655583	ENSMUSG00000102657.1	Gm37899	2.50885707334773
0.00553399158840672	ENSMUSG00000042102.7	Dmgdh	2.4987165092739
1.06059210247091e-30	ENSMUSG00000064225.6	Paqr9	2.46390236235583
0.0403439547374895	ENSMUSG00000058665.8	En1	2.29946489373244
0.030630882140337	ENSMUSG00000019368.13	Sec14l4	2.2933922310216
0.0255689614526448	ENSMUSG00000105361.1	NA	2.29094756595022
0.0209583716213391	ENSMUSG00000106106.2	ENSMUSG00000106106	2.28658094150088
5.74561522082919e-33	ENSMUSG00000031825.16	Crispld2	2.25180812874748
0.000118957640290437	ENSMUSG00000029195.10	Klb	2.22453025634893
1.26496008358074e-09	ENSMUSG00000038253.6	Hoxa5	2.21240945396134
0.0100891687384007	ENSMUSG00000058914.12	C1qtnf3	2.14162450896139
0.00162108814147016	ENSMUSG00000054976.14	Nyap2	2.09902821011609
0.000260700798294595	ENSMUSG00000024391.7	Apom	2.0715012527262
0.0484081794183625	ENSMUSG00000098973.1	Mir6236	2.05198977769316
0.0462861907111779	ENSMUSG00000024778.12	Fas	2.05027988091847
0.00683678671387345	ENSMUSG00000036655.8	Colec11	2.0345092484705
0.0019590804500195	ENSMUSG00000001506.10	Col1a1	2.01471475312098
4.77511108564483e-12	ENSMUSG00000026398.14	Nr5a2	2.00161036926744
0.0153950784738562	ENSMUSG00000074274.7	D930028M14Rik	1.99371688048105
0.00219478333818805	ENSMUSG00000000861.15	Bcl11a	1.9927059780755
0.00337851678705071	ENSMUSG00000088609.1	Gm24187	1.98272521337952
1.33774529574639e-13	ENSMUSG00000022485.3	Hoxc5	1.97489118663225
0.0307517460483895	ENSMUSG00000035459.17	Stab2	1.9590026797634
0.000215805895842335	ENSMUSG00000025930.6	Msc	1.95321213080078
2.10202692093389e-17	ENSMUSG00000038700.4	Hoxb5	1.94391619500583
3.88290255547423e-08	ENSMUSG00000009281.6	Rarres2	1.91149243908033
1.34563406248148e-17	ENSMUSG00000013584.5	Aldh1a2	1.88780992293109
1.74389862282079e-06	ENSMUSG00000025216.9	Lbx1	1.88395484573798
0.0322930508576832	ENSMUSG00000026715.12	Serpinc1	1.8401372010788
3.25928554841472e-09	ENSMUSG00000009654.4	Oit3	1.83766382252723
0.00166564444379357	ENSMUSG00000085696.8	Hoxaas3	1.81799032854292
2.24106025054338e-23	ENSMUSG00000042453.14	Reln	1.7957885094286
0.0138847977033074	ENSMUSG00000045518.8	Onecut3	1.77471728762486
0.00514357156651168	ENSMUSG00000029546.12	Uncx	1.75186969447299
0.0342270876097314	ENSMUSG00000091736.3	Yy2	1.73052524936447
0.00826807510932658	ENSMUSG00000001566.9	Mnx1	1.72063894260815
1.22211678858659e-46	ENSMUSG00000032554.15	Trf	1.72054190515621
0.00115538416602721	ENSMUSG00000050069.3	Grem2	1.69848759938367
1.70218734508844e-08	ENSMUSG00000036733.16	Rbm42	1.69844210727588
0.0253176492934548	ENSMUSG00000029587.16	Zfp12	1.66807491073939
0.0150285723392002	ENSMUSG00000058773.2	H1f5	1.66138821471888
5.60939208230798e-14	ENSMUSG00000039377.7	Hlx	1.65480200531505
0.0424832681565213	ENSMUSG00000036545.8	Adamts2	1.63428726777162
0.0127895518779919	ENSMUSG00000034957.10	Cebpa	1.6289959848801
0.00229563008328366	ENSMUSG00000023078.6	Cxcl13	1.62014724006239
0.0491067340082247	ENSMUSG00000046610.14	Oacyl	1.60540900646701
0.00519224080926773	ENSMUSG00000019230.14	Lhx9	1.59566515050033
0.0437198981720189	ENSMUSG00000021685.11	Otp	1.54731069968684
0.0381981812280861	ENSMUSG00000040016.16	Ptger3	1.53010895182314
5.78850686472976e-08	ENSMUSG00000016458.14	Wt1	1.5259533625006
0.00166800749098434	ENSMUSG00000028031.6	Dkk2	1.52477166831219
0.0211655273554615	ENSMUSG00000026072.12	Il1r1	1.47085838150785
0.00446705994510501	ENSMUSG00000029797.13	Sspo	1.41119588891991
2.04900767438033e-07	ENSMUSG00000025491.14	Ifitm1	1.40595414581667
0.0068557111780725	ENSMUSG00000065037.1	Rn7sk	1.38331282361117
0.000131307422373069	ENSMUSG00000024529.13	Lox	1.38047003943681
0.00433833258671614	ENSMUSG00000015396.4	Cd83	1.36155867958758
3.35329311946284e-08	ENSMUSG00000000247.11	Lhx2	1.34748602333344
0.000342978212991811	ENSMUSG00000097336.8	Fendrr	1.33119042464157
3.30419063231639e-29	ENSMUSG00000022186.14	Oxct1	1.32745201387297
2.39273754593854e-23	ENSMUSG00000053080.10	2700081O15Rik	1.31958348956394
0.0193322264354372	ENSMUSG00000027230.9	Creb3l1	1.27711630997112
0.000311558685659021	ENSMUSG00000037335.13	Hand1	1.26795377917706
0.0133302111551021	ENSMUSG00000037370.13	Enpp1	1.26120103805448
2.19818078568577e-19	ENSMUSG00000042812.5	Foxf1	1.24859102223241
0.0456785977821627	ENSMUSG00000019929.16	Dcn	1.24405629771902
0.0171389402377612	ENSMUSG00000060257.2	Scrt2	1.2388269311592
0.0337607943849233	ENSMUSG00000020679.11	Hnf1b	1.22461899095013
0.019902390200498	ENSMUSG00000036913.15	Trim67	1.21799150221505
0.019902390200498	ENSMUSG00000029337.2	Fgf5	1.19402894780237
0.000889333970255807	ENSMUSG00000041073.10	Nacad	1.16535793597126
0.00707898020277191	ENSMUSG00000042985.7	Upk3b	1.16373137201248
0.0338709915269468	ENSMUSG00000033007.15	Asic4	1.16245893796208
2.29877810542079e-08	ENSMUSG00000038112.15	AW551984	1.14067776252135
7.34750637737414e-11	ENSMUSG00000105211.1	Gm47302	1.13778708795369
0.000366641498032017	ENSMUSG00000048126.16	Col6a3	1.13568434567174
1.91968870119946e-38	ENSMUSG00000021171.8	Esyt2	1.12628202778754
0.00101051875905703	ENSMUSG00000020701.12	Tmem132e	1.12272830872868
0.0265490900943579	ENSMUSG00000020080.8	Hkdc1	1.10934288135006
1.51491635266716e-06	ENSMUSG00000017692.8	Rhbdl3	1.1041872177832
1.19149574301706e-60	ENSMUSG00000040856.17	Dlk1	1.09825507791668
1.3819705117476e-74	ENSMUSG00000042197.13	Zfp451	1.09042856754086
0.034806479645947	ENSMUSG00000037762.6	Slc16a9	1.08458716494913
1.26412092041815e-07	ENSMUSG00000025105.9	Bnc1	1.06832589237247
0.0301452678074769	ENSMUSG00000059401.13	Mamld1	1.06765407695146
0.000842812658540698	ENSMUSG00000000942.10	Hoxa4	1.0628762240267
9.07413115394235e-09	ENSMUSG00000052854.15	Nrk	1.06133294055052
0.00065228049908483	ENSMUSG00000024986.11	Hhex	1.06126342774114
0.00113960075845067	ENSMUSG00000079450.11	Cldn34c1	1.04530386666739
0.0350817910841633	ENSMUSG00000033717.5	Adra2a	1.03480924657
3.88180754785228e-09	ENSMUSG00000029661.16	Col1a2	1.01828880216287
0.00372692971745634	ENSMUSG00000030222.13	Rerg	1.01513140131383
0.0179380235107662	ENSMUSG00000018698.15	Lhx1	1.0129739566889
0.000903367333645804	ENSMUSG00000063506.13	Arhgap22	1.01013889621289
8.91795526485517e-06	ENSMUSG00000050786.8	Ccdc126	1.01000123571004
0.00446705994510501	ENSMUSG00000084897.1	Gm14226	1.00987168938704
1.25517684046433e-168	ENSMUSG00000029581.14	Fscn1	0.998643600243486
5.2535274340335e-12	ENSMUSG00000021057.15	Akap5	0.995190845590413
8.68017716863856e-11	ENSMUSG00000023087.15	Noct	0.981574730903515
0.00224717968112924	ENSMUSG00000039058.11	Ak5	0.976037075112062
0.00426163718309897	ENSMUSG00000035000.8	Dpp4	0.965414982465809
3.79591635118877e-05	ENSMUSG00000051279.2	Gdf6	0.963579044945798
0.00417448547364953	ENSMUSG00000026589.14	Sec16b	0.960576161103776
0.00163474202291553	ENSMUSG00000043013.10	Onecut1	0.92087052459838
3.64936029240898e-05	ENSMUSG00000027508.15	Pag1	0.909016514602497
0.0455426516803488	ENSMUSG00000022306.8	Zfpm2	0.902819963555492
4.71507141620128e-05	ENSMUSG00000031570.17	Plpp5	0.895304299638112
1.51551625713305e-05	ENSMUSG00000042202.15	Slc35e2	0.895093226061586
0.0144818309297011	ENSMUSG00000026840.14	Lamc3	0.894407459209955
6.51075195225311e-17	ENSMUSG00000041390.18	Mdfic	0.890798579812384
0.0319069144960402	ENSMUSG00000109936.1	Gm45889	0.886030446760758
4.98841943153733e-07	ENSMUSG00000041119.11	Pde9a	0.883481427164859
4.88736000374085e-06	ENSMUSG00000048138.9	Dmrt2	0.878861406059198
4.64193769503703e-10	ENSMUSG00000008575.17	Nfib	0.877509494015317
4.56486376726932e-12	ENSMUSG00000028654.13	Mycl	0.861966832502422
0.000531493971711862	ENSMUSG00000020908.14	Myh3	0.861770911785492
0.0392657577369465	ENSMUSG00000090958.2	Lrrc32	0.861638854827224
5.27116710877825e-05	ENSMUSG00000027221.5	Chst1	0.860066551085794
0.000253507043500322	ENSMUSG00000075394.4	Hoxc4	0.853966376026085
0.0213569709335235	ENSMUSG00000022894.5	Adamts5	0.84681673086525
0.000926831073974654	ENSMUSG00000017344.4	Vtn	0.84148939040467
0.00468939833206931	ENSMUSG00000019913.4	Sim1	0.839381447472178
0.00340108476786554	ENSMUSG00000038692.8	Hoxb4	0.829323136937754
1.75327411449123e-11	ENSMUSG00000026043.18	Col3a1	0.817513140952809
0.0209149405567197	ENSMUSG00000027692.16	Tnik	0.815652130336375
0.0446138215404342	ENSMUSG00000068428.6	Gmnc	0.811058558344415
0.0425712941047697	ENSMUSG00000015599.9	Ttbk1	0.805328372082909
0.00764998499901012	ENSMUSG00000043079.17	Synpo	0.803105687687105
0.0214552101922213	ENSMUSG00000019832.5	Rab32	0.802517737517749
0.00209658451440288	ENSMUSG00000048612.16	Myof	0.788628561810819
0.0219174081972777	ENSMUSG00000028565.18	Nfia	0.778581714210758
0.00494333278813444	ENSMUSG00000074794.10	Arrdc3	0.765466990988854
0.014172047533795	ENSMUSG00000014846.12	Tppp3	0.758409572663438
1.79005672021018e-11	ENSMUSG00000031239.5	Itm2a	0.753914250874917
0.000889333970255807	ENSMUSG00000022636.13	Alcam	0.746554908056346
1.8806740831795e-07	ENSMUSG00000046743.6	Fat4	0.734867496170858
0.003554944805975	ENSMUSG00000022382.14	Wnt7b	0.733900349170917
0.0102765186145319	ENSMUSG00000037999.13	Arap2	0.733013370828449
0.00745895833365291	ENSMUSG00000002266.17	Zim1	0.730335956525629
0.00115538416602721	ENSMUSG00000070304.12	Scn2b	0.726608435701639
0.0244915317500919	ENSMUSG00000085925.3	Rtl1	0.725513333790475
0.00157033164940587	ENSMUSG00000026399.12	Cd55	0.722633881259507
0.0431820246892857	ENSMUSG00000053399.9	Adamts18	0.720803547742483
8.82546388049256e-06	ENSMUSG00000074607.11	Tox2	0.717412488317568
8.79513634104424e-06	ENSMUSG00000046318.15	Ccbe1	0.716787320677599
1.31886770599267e-28	ENSMUSG00000042607.15	Asb4	0.690686751515667
3.0563453894416e-05	ENSMUSG00000071064.13	Zfp827	0.689418986087333
9.66335098495107e-05	ENSMUSG00000030930.14	Chst15	0.68913828514845
0.000590715270120233	ENSMUSG00000055435.6	Maf	0.685535617025603
0.024435262923081	ENSMUSG00000101174.6	Hoxd4	0.685444000611425
0.0387295447322065	ENSMUSG00000035775.2	Krt20	0.6850304326143
0.00149185119151583	ENSMUSG00000005836.8	Gata6	0.666399543174646
0.0298980793582212	ENSMUSG00000032679.12	Cd59a	0.665423878648313
0.000155306775775086	ENSMUSG00000020173.17	Cobl	0.65769490458164
0.0103171288655583	ENSMUSG00000022144.3	Gdnf	0.655428158965766
0.021610463631489	ENSMUSG00000042751.14	Nmnat2	0.654843486315465
0.0214341827135899	ENSMUSG00000019899.16	Lama2	0.654040038860323
0.00185657878298458	ENSMUSG00000070327.14	Rnf213	0.653091995811391
0.00168519029583873	ENSMUSG00000006651.8	Aplp1	0.650547894928587
0.046378561563483	ENSMUSG00000048216.13	Gpr85	0.649468555099364
3.22049443612791e-06	ENSMUSG00000036098.15	Myrf	0.646442893462529
0.00951418214477392	ENSMUSG00000048826.6	Dact2	0.643220481495083
0.00593738023014891	ENSMUSG00000061603.8	Akap6	0.642244490291737
0.0155587173453816	ENSMUSG00000089998.2	Phtf1os	0.637076846799929
0.0446138215404342	ENSMUSG00000015653.13	Steap2	0.634402460244722
0.00783654881000453	ENSMUSG00000022514.14	Il1rap	0.631958530736103
0.00266832683644547	ENSMUSG00000025092.6	Hspa12a	0.615485553319455
0.0227645518994453	ENSMUSG00000045005.9	Fzd5	0.608425945794022
0.0114557917895683	ENSMUSG00000018217.12	Pmp22	0.60511697065177
0.000926831073974654	ENSMUSG00000079037.9	Prnp	0.605035938887122
5.15399709303164e-05	ENSMUSG00000064080.12	Fbln2	0.599330239982082
0.000229084002229529	ENSMUSG00000055707.13	Klhl26	0.596968813543267
0.0443370780733538	ENSMUSG00000035441.14	Myo1d	0.582202668408046
7.59062365348312e-06	ENSMUSG00000020182.16	Ddc	0.582068913330798
0.00403345162821411	ENSMUSG00000029287.14	Tgfbr3	0.579616959391957
3.0563453894416e-05	ENSMUSG00000028019.9	Pdgfc	0.574380426386596
0.0425775436624954	ENSMUSG00000058297.16	Spock2	0.56427489029129
3.96372039458993e-16	ENSMUSG00000107476.2	Zfp862-ps	0.563366331542067
0.0158692476754728	ENSMUSG00000028108.15	Ecm1	0.559505396606995
0.00210606003838134	ENSMUSG00000045680.8	Tcf21	0.555183816035002
0.003439921903207	ENSMUSG00000061288.13	Taok3	0.553594486508535
0.0099763517377092	ENSMUSG00000032802.8	Srxn1	0.549453395948373
0.0110684627224612	ENSMUSG00000046999.2	1110032F04Rik	0.548230445165496
0.000978620703285433	ENSMUSG00000002602.16	Axl	0.547587682466649
4.73380785857795e-06	ENSMUSG00000080316.10	Spaca6	0.545559407118569
0.0364205085198231	ENSMUSG00000026950.17	Neb	0.543216979862635
0.0018992963868109	ENSMUSG00000039062.15	Anpep	0.542221607977637
5.75685501854995e-06	ENSMUSG00000039542.16	Ncam1	0.541713656554703
0.0105091012920253	ENSMUSG00000030672.12	Mylpf	0.540677130707216
0.00448833871367275	ENSMUSG00000097391.8	Mirg	0.533179873867593
0.0475455881314426	ENSMUSG00000025592.17	Dach2	0.531108500575236
3.18064112655998e-09	ENSMUSG00000019817.18	Plagl1	0.529754646208175
4.84302000058631e-05	ENSMUSG00000053192.9	Mllt11	0.524912710370254
0.00970295804999613	ENSMUSG00000029126.7	Nsg1	0.521696182058395
0.000140250175967439	ENSMUSG00000015568.16	Lpl	0.515979801079635
0.00644829255511351	ENSMUSG00000020183.11	Cpm	0.513137730095256
0.00475286901686929	ENSMUSG00000036339.17	Tmem260	0.508872890144384
0.0148710752346335	ENSMUSG00000021253.7	Tgfb3	0.501398088617153
0.00568845813679023	ENSMUSG00000026730.12	Pter	0.500243949653276
0.0476084115326955	ENSMUSG00000037820.15	Tgm2	0.499396078576751
0.0273329877378378	ENSMUSG00000019880.10	Rspo3	0.498391522743661
0.0172577489872297	ENSMUSG00000048387.8	Osr1	0.498113535621247
0.0449837729432409	ENSMUSG00000041482.16	Piezo2	0.497987491062358
0.0167113627663828	ENSMUSG00000022949.9	Clic6	0.496076937690062
0.0153128011705336	ENSMUSG00000002985.16	Apoe	0.495780786992784
0.0129665418394873	ENSMUSG00000059022.14	Kcp	0.493585494225159
0.0379652146004047	ENSMUSG00000032452.12	Clstn2	0.489615042753849
6.26414270070192e-06	ENSMUSG00000064325.4	Hhip	0.486904926607314
0.0015427146158495	ENSMUSG00000030246.11	Ldhb	0.485855859371187
0.0110121719644314	ENSMUSG00000061576.15	Dpp6	0.481722395761593
0.0162385219658152	ENSMUSG00000038777.19	Sema6c	0.478579240499263
4.21706220684122e-19	ENSMUSG00000097451.10	Rian	0.477817586281298
0.000911311713589563	ENSMUSG00000027082.15	Tfpi	0.477667752771683
0.0299929423084124	ENSMUSG00000030592.18	Ryr1	0.469406221005702
5.26566963490205e-09	ENSMUSG00000018572.10	Phf23	0.469376603156336
0.0121025765839198	ENSMUSG00000035451.7	Foxa1	0.456688256747713
0.0444127574507305	ENSMUSG00000037860.15	Aim2	0.45520868462359
8.1589209369545e-07	ENSMUSG00000055737.12	Ghr	0.443294561214922
0.00683590972885722	ENSMUSG00000020241.13	Col6a2	0.439801428235823
2.43808832658949e-08	ENSMUSG00000039607.15	Rbms3	0.437842611841434
0.00446705994510501	ENSMUSG00000036333.11	Kidins220	0.435652768873715
0.000272869563514595	ENSMUSG00000031383.8	Dusp9	0.435598875598008
0.00149809731732791	ENSMUSG00000020668.10	Kif3c	0.435424535793062
0.0213569709335235	ENSMUSG00000023017.9	Asic1	0.43060240581218
0.0310332752598604	ENSMUSG00000060487.7	Samd5	0.428536213905641
0.0106513669227008	ENSMUSG00000034648.9	Lrrn1	0.421660800447794
0.0151086971368047	ENSMUSG00000021268.17	Meg3	0.416585117269577
0.00333170961631956	ENSMUSG00000035413.8	Tmem98	0.413612361708681
0.0495110924498994	ENSMUSG00000034488.14	Edil3	0.413368521107428
0.000903367333645804	ENSMUSG00000022676.6	Snai2	0.412376802905087
0.00568845813679023	ENSMUSG00000089901.1	Gm8113	0.411232715383445
0.034806479645947	ENSMUSG00000005413.8	Hmox1	0.411033407948851
0.0248680785996735	ENSMUSG00000047747.10	Rnf150	0.40907246204706
0.0134825671614048	ENSMUSG00000047786.12	Lix1	0.408852205970821
5.27138476832254e-08	ENSMUSG00000022893.14	Adamts1	0.408636214855852
0.000591188711719057	ENSMUSG00000046402.10	Rbp1	0.406251982589522
0.0128160420335067	ENSMUSG00000046982.10	Tshz1	0.404816911554889
0.00393420122935543	ENSMUSG00000014329.14	Bicc1	0.400511433613197
0.030630882140337	ENSMUSG00000057880.12	Abat	0.399769051317125
0.0470342315563195	ENSMUSG00000059974.10	Ntm	0.395804778065262
4.4766526478959e-06	ENSMUSG00000075254.11	Heg1	0.394376950506683
0.00136930813386756	ENSMUSG00000027254.13	Map1a	0.394184805631085
0.00233388481998986	ENSMUSG00000030067.17	Foxp1	0.390938456047069
0.0475455881314426	ENSMUSG00000016128.14	Stard13	0.390562354314916
0.0269518347562895	ENSMUSG00000030283.7	St8sia1	0.389945751589709
1.28032549166046e-08	ENSMUSG00000021701.8	Plk2	0.384455709126258
0.00434459871941427	ENSMUSG00000028158.14	Mttp	0.383867713719311
0.0349788584363163	ENSMUSG00000042589.18	Cux2	0.383344923279779
0.00233388481998986	ENSMUSG00000051527.11	Usp29	0.381724072783672
0.0147137185111556	ENSMUSG00000002603.15	Tgfb1	0.380073781186395
0.0095100312218976	ENSMUSG00000071042.11	Rasgrp3	0.378747887105224
0.0229039845639736	ENSMUSG00000004328.15	Hif3a	0.377214698532197
0.0433250259277375	ENSMUSG00000056204.8	Pgpep1	0.375033313070132
0.000359154018630106	ENSMUSG00000019966.18	Kitl	0.374303600538735
0.00896988347090616	ENSMUSG00000027602.9	Map1lc3a	0.372880062063518
0.00621422968988741	ENSMUSG00000037664.13	Cdkn1c	0.370582876215799
2.4909086861528e-07	ENSMUSG00000022770.16	Dlg1	0.368177701005349
0.0154498961038763	ENSMUSG00000001870.15	Ltbp1	0.360839628363008
0.0425017517649458	ENSMUSG00000025810.9	Nrp1	0.359784390674723
5.74833367189473e-05	ENSMUSG00000000031.15	H19	0.356165593296593
3.90265028469346e-05	ENSMUSG00000045312.12	Lhfpl2	0.347350454441047
0.0314841768729482	ENSMUSG00000024132.5	Eci1	0.347347105227707
0.0213569709335235	ENSMUSG00000031822.20	Gse1	0.344401967489195
0.000106899548634248	ENSMUSG00000060743.12	H3f3a	0.342176939336403
0.00762473964256989	ENSMUSG00000032601.13	Prkar2a	0.334872623433513
0.0254033495214983	ENSMUSG00000029563.16	Foxp2	0.330902150594081
0.0372300503000245	ENSMUSG00000020340.16	Cyfip2	0.318877316213967
0.003439921903207	ENSMUSG00000049090.2	Zadh2	0.318479787839974
0.0136737123262631	ENSMUSG00000035357.16	Pdzrn3	0.315362076195514
0.001688014080239	ENSMUSG00000019539.11	Rcn3	0.309325164663067
0.00931830489122365	ENSMUSG00000027227.7	Sord	0.308533454431888
0.00113960075845067	ENSMUSG00000038872.10	Zfhx3	0.307801399650089
5.8527742636839e-05	ENSMUSG00000024501.19	Dpysl3	0.305759156201178
0.0358752025896925	ENSMUSG00000016503.16	Gtf3a	0.302564916700009
0.00149185119151583	ENSMUSG00000048661.14	Lemd3	0.302505129229359
0.00337774804195925	ENSMUSG00000052727.6	Map1b	0.298276706754893
0.0220608096491913	ENSMUSG00000028583.14	Pdpn	0.295156121321932
0.0105091012920253	ENSMUSG00000002265.16	Peg3	0.294185413519983
0.00614521728082384	ENSMUSG00000022438.6	Parvb	0.291725356420469
0.0255856054731308	ENSMUSG00000061048.8	Cdh3	0.290424353696581
0.0422427667627357	ENSMUSG00000028476.13	Reck	0.285687934904151
0.0391149112865309	ENSMUSG00000019889.10	Ptprk	0.284107272341285
9.01922938565745e-05	ENSMUSG00000022883.10	Robo1	0.27883404676061
0.00265607034671105	ENSMUSG00000055653.13	Gpc3	0.27850413328905
4.96982031412191e-05	ENSMUSG00000036862.15	Dchs1	0.277282021590763
0.0130648145821982	ENSMUSG00000074364.6	Ehd2	0.274851014518504
0.0338709915269468	ENSMUSG00000026821.15	Ralgds	0.268335229250139
0.00754897982156348	ENSMUSG00000023991.16	Foxp4	0.265653220541526
0.0339662178393815	ENSMUSG00000015839.6	Nfe2l2	0.257370770691597
0.0301414961064492	ENSMUSG00000052516.17	Robo2	0.256752892035271
0.035296618839998	ENSMUSG00000034993.7	Vat1	0.255961152322588
0.0475455881314426	ENSMUSG00000038677.13	Scube3	0.254501212730744
0.00339325459986478	ENSMUSG00000010476.14	Ebf3	0.250893746565019
4.71507141620128e-05	ENSMUSG00000022108.7	Itm2b	0.250661550779708
0.0325311968220454	ENSMUSG00000030890.16	Ilk	0.248053497048427
0.0495725679774907	ENSMUSG00000010175.13	Prox1	0.243175603185514
0.0208499855261324	ENSMUSG00000021133.9	Susd6	0.241447087892441
0.0297824897684318	ENSMUSG00000033792.12	Atp7a	0.237894057310944
0.0114586290351185	ENSMUSG00000025969.15	Nrp2	0.233391180564022
0.00182626408764902	ENSMUSG00000061411.12	Nol4l	0.230934007854071
0.0240765960745227	ENSMUSG00000018474.17	Chd3	0.22930615331247
9.07389034131589e-05	ENSMUSG00000092035.8	Peg10	0.229161570603537
0.0456785977821627	ENSMUSG00000004207.14	Psap	0.221347999762621
0.0289420843408405	ENSMUSG00000044365.15	Cxxc4	0.219869425984438
0.0107902381546398	ENSMUSG00000020844.6	Nxn	0.219660272917956
0.0254033495214983	ENSMUSG00000030849.18	Fgfr2	0.215509940227016
0.0246232697378575	ENSMUSG00000000957.10	Mmp14	0.210874493734458
0.0366257295964722	ENSMUSG00000036667.14	Tcaf1	0.208575316414848
0.0164722148109728	ENSMUSG00000056608.14	Chd9	0.192338862875348
0.0479253092065129	ENSMUSG00000031523.16	Dlc1	0.189729309441926
0.0479253092065129	ENSMUSG00000008393.8	Carhsp1	0.18313088631892
0.030630882140337	ENSMUSG00000047888.9	Tnrc6b	0.161250261017202

## Sheet: Down
padj	geneName	HGNC	log2FoldChange
0.000131013552300438	ENSMUSG00000078234.6	Klhdc7a	-21.4597864180088
0.000181417017843774	ENSMUSG00000095538.1	Gm21983	-21.124014705685
0.00393420122935543	ENSMUSG00000061877.13	BC048679	-6.5225466102415
0.0101834981093656	ENSMUSG00000083319.1	Gm11284	-6.24796641826183
0.0209149405567197	ENSMUSG00000114610.1	Cyp2c52-ps	-6.01731544150101
0.000346473745871848	ENSMUSG00000098652.1	Gm27671	-5.24898354632388
0.024998935595379	ENSMUSG00000097836.1	Gm26903	-4.7941479184065
0.0464789405581383	ENSMUSG00000097457.1	NA	-4.28786118064426
1.10719065160392e-11	ENSMUSG00000111661.1	Gm46142	-4.27442553537872
1.4235898346528e-08	ENSMUSG00000112120.1	Gm32255	-3.81531707226034
0.0370121070306156	ENSMUSG00000037716.15	Ccdc33	-3.69100319160153
1.61426340019495e-21	ENSMUSG00000105359.1	Rpl21-ps10	-3.63486009949771
1.18689276540291e-13	ENSMUSG00000104418.1	Gm37070	-3.51351512525516
3.2239094414466e-16	ENSMUSG00000037868.15	Egr2	-3.18833512320741
3.96381522037023e-06	ENSMUSG00000050334.12	C130071C03Rik	-3.18604224056525
9.34469691833972e-23	ENSMUSG00000084383.1	Gm13370	-2.89373793183254
6.27378727068952e-17	ENSMUSG00000081559.3	Gm12411	-2.89227897528103
1.41676497626847e-22	ENSMUSG00000066443.5	Gm10163	-2.88195198799476
0.000346473745871848	ENSMUSG00000047976.4	Kcna1	-2.87969208389775
4.49250274715485e-22	ENSMUSG00000068397.4	Gm10240	-2.82115891969847
0.022693453342803	ENSMUSG00000114103.1	Gm8557	-2.60477099771889
0.00780127830152148	ENSMUSG00000029659.16	Medag	-2.43749506805787
1.16781819389583e-14	ENSMUSG00000083596.4	Rpl21-ps15	-2.19079054614341
8.72843084353896e-10	ENSMUSG00000094326.1	Gm10045	-2.06687516338524
6.13841754139414e-05	ENSMUSG00000094092.1	Gm15921	-1.90805500704682
0.000196967197292451	ENSMUSG00000042268.10	Slc26a9	-1.87302643398977
2.30211114578814e-08	ENSMUSG00000083394.2	Gm11703	-1.81301028546875
0.00895762734790089	ENSMUSG00000081974.3	Gm11960	-1.80271775956022
0.000695297993704409	ENSMUSG00000028946.7	Hes3	-1.77732558469292
0.0456785977821627	ENSMUSG00000044518.3	Foxe3	-1.75026831163442
0.0337607943849233	ENSMUSG00000030491.16	Tdrd12	-1.71383254642998
0.00960357440771407	ENSMUSG00000045725.5	Prr15	-1.68116856789188
1.52344702941574e-07	ENSMUSG00000095524.1	Gm15682	-1.6071256692345
4.34671146652339e-09	ENSMUSG00000041674.16	BC006965	-1.45566206638654
3.14428922059041e-51	ENSMUSG00000027848.12	Olfml3	-1.4227594272369
0.0356736114838527	ENSMUSG00000085870.1	Gm12829	-1.28555583085175
0.00393736560483986	ENSMUSG00000059912.4	Rpl21-ps6	-1.27925667509414
9.01922938565745e-05	ENSMUSG00000097769.7	NA	-1.23603273077827
0.00258911248466132	ENSMUSG00000024737.2	Slc15a3	-1.21981904869893
2.90563366721032e-05	ENSMUSG00000026976.15	Pax8	-1.20542665897861
0.000116469520515622	ENSMUSG00000104155.1	Gm38103	-1.14368364619193
1.38124684969281e-05	ENSMUSG00000028152.10	Tspan5	-1.14325095759459
0.0491067340082247	ENSMUSG00000069372.3	Ctxn3	-1.12536462752219
0.0129564312623366	ENSMUSG00000084860.1	2610204G07Rik	-1.11340986054522
0.0357959271469538	ENSMUSG00000030406.7	Gipr	-1.05053124127745
6.72371586203223e-19	ENSMUSG00000048377.6	Foxi2	-1.0501389438892
0.000939036315538105	ENSMUSG00000023391.8	Dlx2	-1.03151695605427
0.0109064013460405	ENSMUSG00000066180.5	Gm10155	-0.999090118672218
4.18454509138339e-10	ENSMUSG00000001985.9	Grik3	-0.991518187679835
4.18454509138339e-10	ENSMUSG00000022941.8	Ripply3	-0.981372654791105
0.00156341164614811	ENSMUSG00000041911.3	Dlx1	-0.980566033223722
0.014217993710133	ENSMUSG00000029755.10	Dlx5	-0.977475520290995
7.48783068347211e-11	ENSMUSG00000054226.13	Tprkb	-0.968932898075401
0.0191379240469799	ENSMUSG00000109866.1	Gm45714	-0.967644699739568
0.00339226698563184	ENSMUSG00000018486.2	Wnt9b	-0.967419204036924
1.02706953709699e-09	ENSMUSG00000026994.9	Galnt3	-0.95686523304514
0.00176569033594093	ENSMUSG00000025219.13	Fgf8	-0.950907751579291
5.11163527641171e-08	ENSMUSG00000021765.8	Fst	-0.922130828504145
0.0458833345837039	ENSMUSG00000039934.12	Gsap	-0.914417928639147
1.35841647631415e-25	ENSMUSG00000063415.12	Cyp26b1	-0.914132010835813
4.71507141620128e-05	ENSMUSG00000075270.11	Pde11a	-0.905997174378959
2.70526361234646e-06	ENSMUSG00000085399.7	Foxd2os	-0.869488035644058
0.00100403100439743	ENSMUSG00000020542.18	Myocd	-0.869221248180721
0.00315670233443658	ENSMUSG00000004231.15	Pax2	-0.861853441923158
0.0247833139586509	ENSMUSG00000031074.14	Fgf3	-0.86080871752648
5.93847988786978e-06	ENSMUSG00000058669.7	Nkx2-9	-0.843593076697119
0.00159343599274021	ENSMUSG00000055874.6	Foxi3	-0.842415643061124
5.97495431907915e-25	ENSMUSG00000016664.14	Pacsin2	-0.808682880337904
0.000116469520515622	ENSMUSG00000038151.13	Prdm1	-0.802193990885654
0.0182966055345911	ENSMUSG00000030589.15	Rasgrp4	-0.799736934494772
6.34911812904475e-08	ENSMUSG00000056153.14	Socs6	-0.786262385343207
2.39784312107886e-26	ENSMUSG00000021756.12	Il6st	-0.748252013353419
2.38044469006669e-09	ENSMUSG00000040767.10	Snrnp25	-0.746806429906236
0.000155306775775086	ENSMUSG00000050520.4	Cldn8	-0.736746611026973
0.0127895518779919	ENSMUSG00000068014.5	Gm14648	-0.732631374158161
4.54827341789989e-15	ENSMUSG00000021359.16	Tfap2a	-0.725396681657937
3.37173817528368e-19	ENSMUSG00000022836.10	Mylk	-0.7244216134596
9.41607858666984e-18	ENSMUSG00000032291.8	Crabp1	-0.707420610082176
0.000161220342594455	ENSMUSG00000021360.16	Gcnt2	-0.699490170446627
7.09539051877878e-08	ENSMUSG00000036030.9	Prtg	-0.6906965861964
0.013819378524957	ENSMUSG00000058153.15	Sez6l	-0.681618587474634
0.00461884231851378	ENSMUSG00000022061.8	Nkx3-1	-0.658167793020363
0.0110468801939655	ENSMUSG00000022425.15	Enpp2	-0.6493632221291
0.0314841768729482	ENSMUSG00000070425.12	Xntrpc	-0.64140889552063
9.75903954347774e-06	ENSMUSG00000037754.13	Ppp1r16b	-0.640917267447571
1.91640571281974e-07	ENSMUSG00000029999.14	Tgfa	-0.639207392290913
1.51491635266716e-06	ENSMUSG00000009097.9	Tbx1	-0.634409719394691
0.00472588083734958	ENSMUSG00000026686.14	Lmx1a	-0.625528898347797
6.14170865246633e-07	ENSMUSG00000063972.13	Nr6a1	-0.616805705632018
9.16623290857288e-07	ENSMUSG00000050966.9	Lin28a	-0.613781196130751
0.00337548409901019	ENSMUSG00000026437.11	Cdk18	-0.600807038772586
0.0449837729432409	ENSMUSG00000107577.1	Gm44103	-0.599125594682043
0.0141835365169425	ENSMUSG00000034330.10	Plcg2	-0.592091048898331
0.000480516340908016	ENSMUSG00000049493.13	Pls1	-0.578780656868528
0.00237223572294295	ENSMUSG00000044288.6	Cnr1	-0.578581469802346
0.000978380755092812	ENSMUSG00000044501.17	Zfp758	-0.550958165996049
4.68732339220903e-05	ENSMUSG00000022286.15	Grhl2	-0.542815469305585
0.0299611227705322	ENSMUSG00000025215.10	Tlx1	-0.542207205929075
0.0437094006557085	ENSMUSG00000041623.17	D11Wsu47e	-0.539885711716147
0.000783423282758826	ENSMUSG00000060969.9	Irx1	-0.538490434613294
0.0437094006557085	ENSMUSG00000086040.8	Wipf3	-0.525315394791539
0.0349788584363163	ENSMUSG00000035310.15	Lin54	-0.524192652806906
0.00237223572294295	ENSMUSG00000029189.10	Sel1l3	-0.517594416493089
2.80669699073453e-06	ENSMUSG00000036617.16	Etl4	-0.510910594497619
0.0151836472450495	ENSMUSG00000031616.7	Ednra	-0.502810355877799
0.000124661944407898	ENSMUSG00000033006.9	Sox10	-0.502713251217596
0.0285848477303399	ENSMUSG00000028640.11	Tfap2c	-0.499630371422347
0.00614521728082384	ENSMUSG00000037010.7	Apln	-0.492932209043568
0.0486489744087823	ENSMUSG00000018973.2	Hoxb1	-0.481598202563715
0.00601033393338087	ENSMUSG00000039347.7	Atp6v0e2	-0.479716607436941
0.0148207032659865	ENSMUSG00000075703.15	Selenoi	-0.479384468691778
0.000608707829512473	ENSMUSG00000039476.13	Prrx2	-0.475880404971216
0.0110468801939655	ENSMUSG00000041309.17	Nkx6-2	-0.474529306940341
0.019902390200498	ENSMUSG00000067818.6	Myl9	-0.462428105986123
0.0251226480361142	ENSMUSG00000059246.4	Foxb1	-0.447898079359368
0.000377950065336954	ENSMUSG00000084844.3	Hoxb3os	-0.447365377315265
9.37780996779926e-07	ENSMUSG00000018166.8	Erbb3	-0.445165704496522
0.00209544008645617	ENSMUSG00000040728.15	Esrp1	-0.444262840129461
0.00788661379025028	ENSMUSG00000042106.5	Inka1	-0.44330716641043
0.0437094006557085	ENSMUSG00000019256.17	Ahr	-0.438370584414474
0.000216078347843274	ENSMUSG00000042942.16	Greb1l	-0.436208300384134
0.000332449689160431	ENSMUSG00000022150.16	Dab2	-0.433312212207888
0.0306072757504721	ENSMUSG00000097412.2	1810014B01Rik	-0.431531215906727
0.00206515509461242	ENSMUSG00000048078.16	Tenm4	-0.420008640252529
0.0345682061760314	ENSMUSG00000029859.6	Epha1	-0.413345148247711
0.00748030944431158	ENSMUSG00000015619.10	Gata3	-0.41216927862195
0.0107787447090382	ENSMUSG00000024087.3	Cyp1b1	-0.407394573169504
0.00109489364660846	ENSMUSG00000040717.6	Il17rd	-0.40421837941819
0.0285848477303399	ENSMUSG00000017723.11	Wfdc2	-0.400773986866957
0.0198574691864185	ENSMUSG00000022580.12	Rhpn1	-0.398169006726911
0.0350817910841633	ENSMUSG00000019027.7	Dnah1	-0.397449268511086
1.08743239578547e-12	ENSMUSG00000000563.17	Atp5pb	-0.392940557396733
0.00524768957050121	ENSMUSG00000041540.16	Sox5	-0.38746453072066
0.00697573704905079	ENSMUSG00000010067.13	Rassf1	-0.381061572540897
0.000480516340908016	ENSMUSG00000025932.14	Eya1	-0.380254975470576
6.14020135180907e-08	ENSMUSG00000045394.8	Epcam	-0.379458578998882
0.00931809978729948	ENSMUSG00000037211.12	Spry1	-0.377419226706073
0.0169775075028416	ENSMUSG00000025085.16	Ablim1	-0.374289662197319
0.00149185119151583	ENSMUSG00000022114.4	Spry2	-0.374094525660254
0.00541614323371171	ENSMUSG00000024134.11	Six2	-0.371110126172862
0.00337851678705071	ENSMUSG00000072568.4	Lratd2	-0.367801961636205
0.0379160223778945	ENSMUSG00000039356.15	Exosc2	-0.364353381741
0.00128094774118028	ENSMUSG00000052396.7	Mogat2	-0.364025540770741
7.38636448276466e-07	ENSMUSG00000037169.15	Mycn	-0.358837131073473
0.0195845350981293	ENSMUSG00000002820.6	Atg4d	-0.348359004335091
0.0299929423084124	ENSMUSG00000034275.18	Igsf9b	-0.346811041795522
0.0105091012920253	ENSMUSG00000041147.10	Brca2	-0.346383540066067
0.00306490594189532	ENSMUSG00000068748.7	Ptprz1	-0.341834575301562
0.0263224608800563	ENSMUSG00000003526.11	Prodh	-0.336250732490861
0.0425775436624954	ENSMUSG00000026754.16	Golga1	-0.333290665768379
0.0270928305018796	ENSMUSG00000021124.13	Vti1b	-0.325494651609247
0.024347358585503	ENSMUSG00000040620.15	Dhx33	-0.322691087594399
0.00319210884585568	ENSMUSG00000079259.2	Trim71	-0.317598307403001
0.0138521419452852	ENSMUSG00000031665.7	Sall1	-0.316092362477285
0.0295177238014419	ENSMUSG00000041020.14	Map7d2	-0.312016641174956
0.0114575725475962	ENSMUSG00000017376.15	Nlk	-0.309492126803095
0.0277064375066384	ENSMUSG00000026694.19	Eef1aknmt	-0.302163496495215
1.43594594615217e-08	ENSMUSG00000031548.7	Sfrp1	-0.300105297163157
0.0488157073703343	ENSMUSG00000020027.18	Socs2	-0.291087186221307
0.0131831554084796	ENSMUSG00000013089.15	Etv5	-0.290594822747859
0.000253507043500322	ENSMUSG00000027778.15	Ift80	-0.283405601979539
0.00319210884585568	ENSMUSG00000039686.14	Zer1	-0.278426747736162
0.0264696209306882	ENSMUSG00000011958.17	Bnip2	-0.273137098175546
3.17942129500103e-05	ENSMUSG00000021182.15	Ccdc88c	-0.271441199391859
0.025232128807836	ENSMUSG00000035107.13	Dcbld2	-0.259973365864394
0.0449837729432409	ENSMUSG00000023906.2	Cldn6	-0.259387900804527
9.21375742287466e-05	ENSMUSG00000027276.7	Jag1	-0.257746017784008
0.0408893479749437	ENSMUSG00000022483.16	Col2a1	-0.257030858304749
0.00649805265483412	ENSMUSG00000004885.5	Crabp2	-0.256544010552444
0.035296618839998	ENSMUSG00000027478.15	Dnmt3b	-0.25559419037238
0.00519224080926773	ENSMUSG00000051306.7	Usp42	-0.255544171255504
0.0449837729432409	ENSMUSG00000032123.5	Dpagt1	-0.25335184561057
0.000229084002229529	ENSMUSG00000020092.9	Pald1	-0.248430937181979
1.0377108461161e-07	ENSMUSG00000042323.16	Pbrm1	-0.246860557697549
0.0475455881314426	ENSMUSG00000025921.7	Rdh10	-0.242630915797952
0.00125777848457467	ENSMUSG00000063804.8	Lin28b	-0.229335431825687
9.85972039462822e-07	ENSMUSG00000034342.9	Cbl	-0.228338073881852
0.0219174081972777	ENSMUSG00000038388.14	Mpp6	-0.221149702975725
5.65147407302201e-06	ENSMUSG00000027351.14	Spred1	-0.208842142046796
0.0215202372412325	ENSMUSG00000000131.15	Xpo6	-0.207377633695885
0.00123442180359822	ENSMUSG00000037236.14	Matr3	-0.203330953195542
0.0223746789317183	ENSMUSG00000044465.19	Fam160a2	-0.200609079646951
0.00237223572294295	ENSMUSG00000056394.17	Lig1	-0.197784851933543
0.0427250836865597	ENSMUSG00000049532.10	Sall2	-0.189080430135701
0.0298980793582212	ENSMUSG00000027787.14	Nmd3	-0.185254193890131
0.0178678233292623	ENSMUSG00000014907.10	Naf1	-0.184806835030424
0.0441374604447759	ENSMUSG00000030660.9	Pik3c2a	-0.182284858152233
0.0319069144960402	ENSMUSG00000036523.16	Greb1	-0.178801668452935
0.00132416916706153	ENSMUSG00000020463.15	Ppp4r3b	-0.178509194821458
0.00533620863169789	ENSMUSG00000039959.13	Hip1	-0.174913848439568
0.00754897982156348	ENSMUSG00000042410.15	Agps	-0.174203125493163
0.0471846313910546	ENSMUSG00000028345.15	Tex10	-0.172728162610332
0.0297824897684318	ENSMUSG00000113555.1	Gm10095	-0.171989231660363
0.00533620863169789	ENSMUSG00000038214.15	Bend3	-0.168960681641801
0.0137269238420472	ENSMUSG00000025743.14	Sdc3	-0.167603642809186
0.00554937890137885	ENSMUSG00000078249.5	Hmga1b	-0.160473597838925
0.0338510993459629	ENSMUSG00000028403.15	Zdhhc21	-0.157940539188923
0.0298980793582212	ENSMUSG00000017999.16	Ddx27	-0.153570960757729
0.003439921903207	ENSMUSG00000020075.8	Ddx21	-0.150441575112555
0.0378348366338075	ENSMUSG00000042308.14	Setd1a	-0.140200430950637
0.0315600589243753	ENSMUSG00000028614.14	Ndc1	-0.137090817996252
0.0422427667627357	ENSMUSG00000028633.7	Ctps	-0.127735544032016
0.0495725679774907	ENSMUSG00000029657.15	Hsph1	-0.124223280993138
0.0429513187284486	ENSMUSG00000028960.18	Ube4b	-0.120716688425104
0.0442157891873842	ENSMUSG00000028034.15	Fubp1	-0.118860361456861
