# Supplementary material for: Variations in the poly-histidine repeat motif of HOXA1 predispose individuals to bicuspid aortic valve
Source: Research Square preprint supplement (doi:10.21203/rs.3.rs-1415862/v1), 2022-03-10
Supplement: Supplementary file 3 [file 26bb3c9bc1d576c174ff4db1.docx]

| Patient  HOXA1 genotype | Age at diagnosis, yr | Sex | BAV Subtype | Predominant AV function | Family history | Leaflet calcification |
| --- | --- | --- | --- | --- | --- | --- |
| **BAV30**  -1His, WTA | 20.3 | M | Type 1, RC/LC | Moderate AR | no | - |
| **BAV32**  +1**HisArg**, WTA | 24 | M | Type 0, ap | severe AR | no | - |
| **BAV51**  -1His, WTA | 61 | M | Type 1, RC/LC | Severe AS | yes | + |
| **BAV58**  +1His, WTA | 41 | F | Type 1, RC/LC | moderate AR | no | - |
| **BAV89**  -1His, WTA | 68 | F | Type 1, RC/LC | Severe AS | no | +++ |
| **BAV103**  -1His, WTA | 44 | F | Type 1; RC/LC | Small AR | no | - |
| **BAV116**  +1**His**, WTA | 65 | F | Type 1, RC/LC | moderate AR | no | - |
| **BAV117**  -1His, WTA | 68 | F | Type 1; RC/LC | Severe AS | no | ++ |
| **BAV121**  -1His, WTA | 32 | F | Type 0, RC/LC | Normal | no | - |
| **BAV141**  **-3HisArg**, WTA | 30 | M | Type 0, RC/LC | Severe AR | no | - |
| **BAV148**  -1His, **WTG** | 45 | M | Type 0, RC/LC | Severe AR | no | - |
| **BAV162**  -1His, WTA | 80 | M | Type 1, RC/LC | Severe AS | no | ++ |
| **BAV164**  -1His, WTA | 51 | M | Type 0, CD/CG | Normal | no | - |
| **BAV166**  **-3HisArg**, **-3HisArg** | 45 | M | Type 0, | Severe AS and Severe AR | no | ++ |
| **BAV186**  -1His, **WTG** | 52 | M | Type 2 | Moderate AS | no | ++ |
| **BAV204**  -1His, WTA | 73 | M | Type 1, RC/LC | severe AS | no | ++ |
| **BAV220**  -1His, WTA | 55 | M | Type 1, RC/LC | Normal | no | - |
| **BAV240**  -1His, WTA | 65 | F | Type 1, RC/LC | Moderate AR | no | - |
| **BAV277**  -1His, WTA | 75 | M | Type 1, RC/LC | Severe AS | no | ++ |
| **BAV291**  -1His, WTA | 65 | M | Type 1, RC/LC | Severe AS | no | - |
| **BAV292**  -1His, WTA | 72 | F | Type 1, RC/LC | Small AR | no | - |
| **BAV302**  -1His, WTA | 80 | M | Type 1, RC/LC | Severe AS | no | ++ |
| **BAV313**  +1**His**, WTA | 67 | F | Type 1, RC/LC | Severe AS and Moderate AR | no | ++ |
| **BAV326**  -1His, WTA | 59 | F | Type 1, RC/LC | Severe AS | no | ++ |
| **BAV330**  -1His, WTA | 39 | F | Type 1, RC/LC | Small AR | no | - |
| **BAV347**  +1**His**, WTA | 45 | M | Type 1, RC/NC | Normal | no | + |
| **BAV378**  -1His, WTA | 47 | M | Typepe 1, RC/LC | Moderate AR | no | - |
| **BAV386**  -1His, WTA | 31 | M | Type 1, RC/LC | Severe AR | no | - |
| **BAV390**  -1His, WTA | 41 | M | Type 1, RC/NC | Severe AR | yes | - |

**Supplementary Table 1: Clinical description of BAV patients with *HOXA1* variations**

Number of histidines in stretch are indicated according to genotypes described in table 2. For example, WTA= c.218G>A; WTG= c.218G; -1His = c.[213_215delCCA;218G>A].
